# Supplementary material
Source: HighWire-hosted journal article supplement (https://www.cmaj.ca/highwire/filestream/68473/field_highwire_adjunct_files/1/170527-view-2-at.pdf)
Supplement: 170527-view-2-at.pdf [file 170527-view-2-at.pdf]

## Appendix 2 (as supplied by the authors): How have management recommendations for acute low back pain changed in the past 10 years?

*Increased focus on psychological management and prognostic screening.* The 2016 United Kingdom guideline<sup>1</sup> recommends early combined psychological therapies (cognitive behavioural therapy and operant therapy) and physical therapies (massage, spinal manipulation, exercise) therapies for those at risk of poor outcomes. To identify high-risk patients primary care practitioners can use a prognostic screening tool. Validated examples include the Orebro Musculoskeletal Pain Questionnaire,<sup>2</sup> STarT Back Screening Tool,<sup>3</sup> and the PICKUP tool.<sup>4</sup>

*Decreased focus on pain medicines.* Paracetamol for acute low back pain is no longer recommended. The 2017 United States guideline<sup>5</sup> recommends providing non-pharmacologic management before offering pain medicines. That guideline also discourages the use of opioid analgesics for acute low back pain.

*Widespread recognition of harms of unnecessary imaging.* Choosing Wisely lists – lists developed by healthcare professional associations and their constituents which aim to reduce unnecessary tests and treatments – from Canada (<https://choosingwiselycanada.org/spine/>), the US (<http://choosingwisely.org/clinician-lists/american-college-physicians-imaging-for-non-specific-low-back-pain/>), the UK (<http://choosingwisely.co.uk/i-am-a-clinician/recommendations/#1476656358304-3b84e1d4-043d>) and Australia (<http://choosingwisely.org.au/recommendations/ranzcr#1181>) all discourage imaging of acute low back pain.

*Reduced focus on the use of individual alerting features (red flags) to screen for serious pathology.* Neither of the two recent guidelines endorses individual red flags.<sup>1,5</sup>

### References

1. National Institute for Health and Care Excellence (NICE). *Low back pain and sciatica in over 16s: assessment and management*. NICE guideline [NG59]. London: NICE; 2016.
2. Linton SJ, Halldén K. Can we screen for problematic back pain? A screening questionnaire for predicting outcome in acute and subacute back pain. *Clin J Pain* 1998;14:209-15.
3. Hill JC, Dunn KM, Lewis M, et al. A primary care back pain screening tool: identifying patient subgroups for initial treatment. *Arthritis Rheum* 2008;59:632-41.
4. Traeger AC, Henschke N, Hubscher M, et al. Estimating the risk of chronic pain: development and validation of a prognostic model (PICKUP) for patients with acute low back pain. *PLoS Med* 2016;13:e1002019.
5. Qaseem A, Wilt TJ, McLean RM, et al.; Clinical Guidelines Committee of the American College of Physicians. Non-invasive treatments for acute, subacute, and chronic low back pain: a clinical practice guideline from the American College of Physicians. *Ann Intern Med* 2017;166:514-30.
